# Supplementary material for: Hepatic Epithelioid Hemangioendothelioma in a Dog
Source: MDPI journal article supplement (doi:10.3390/ani14091302), 2024-04-25
Supplement: s1 [file s1]

**Table S1.** Biochemical parameters in dog with hepatic epithelioid hemangioendothelioma.

| Parameter | Value | Unit  | Reference range |
|-----------|-------|-------|-----------------|
| GLU       | 106   | mg/dL | 74-120          |
| ALP       | 47    | U/L   | 16-119          |
| GGT       | 0     | U/L   | 0-11            |
| T.BIL     | 0.33  | mg/dL | 0-0.45          |
| AST       | 31    | U/L   | 15-44           |
| ALT       | 49    | U/L   | 22-78           |
| ALB       | 3.7   | g/DL  | 2.8-4           |
