# Supplementary material for: Hepatic Epithelioid Hemangioendothelioma in a Dog
Source: MDPI journal article supplement (doi:10.3390/ani14091302), 2024-04-25
Supplement: s1 [file s1]

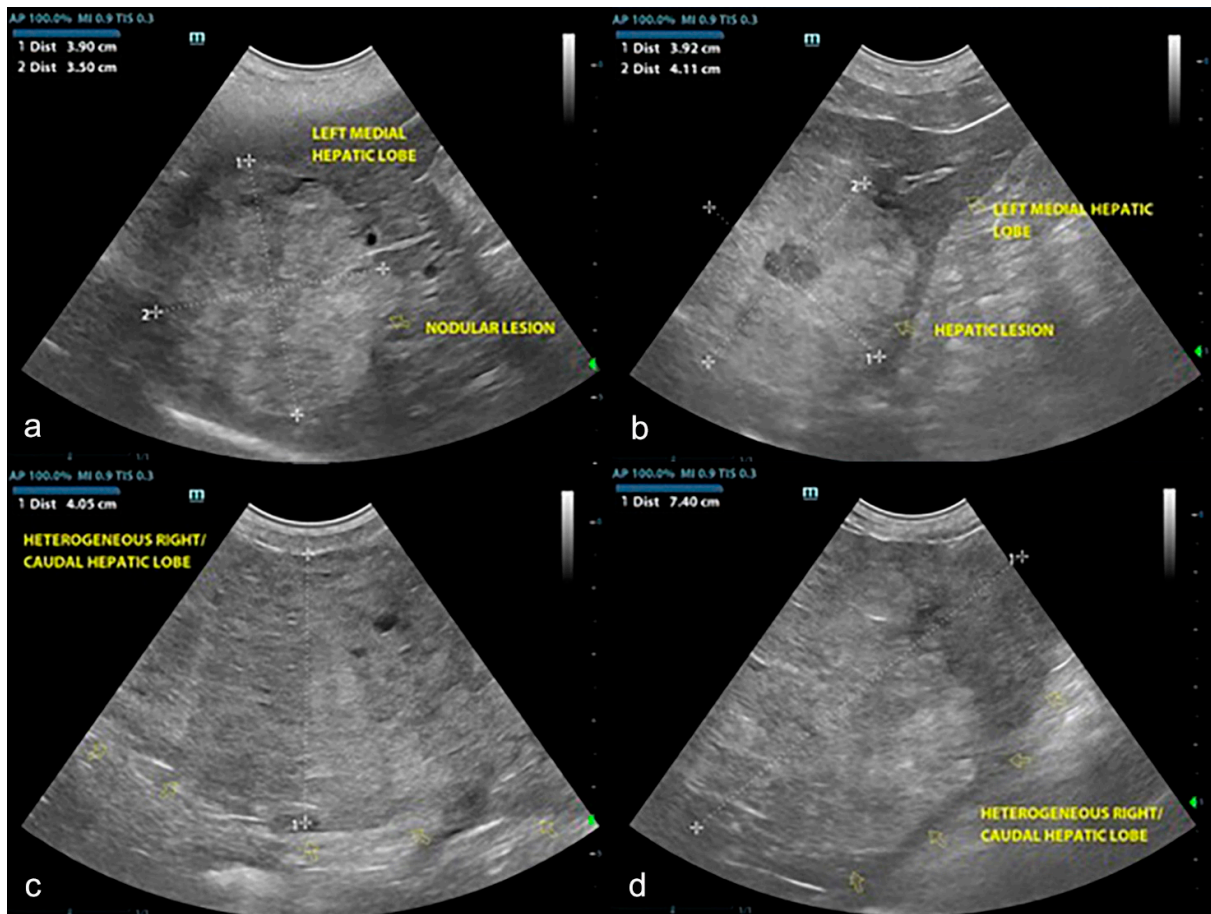

**Figure S1.** Ultrasound of epithelioid hemangioendothelioma, liver, dog. **a)** Left lobe with expansive nodular lesion, **b)** deforming the profile, hyperechoic at defined margins. **c)** Right hepatic lobes of increased size with rounded profile, dysmogeneous parenchyma due to the presence of hyperechoic not defined margin areas. **d)** Remaining parenchyma with coarse structure.
